# Supplementary material
Source: publisher figshare collection journal article supplement (https://gsapubs.figshare.com/ndownloader/files/23315957)
Supplement: Supplementary file 1 [file 23315957]

## Sheet: Sheet1
TABLE S2. Results of phytolith samples from the Barstow Formation. Counted assemblages noted with asterisks, and total number of morphotypes is given for the assemblage. Terminology follows Stromberg (2003). AQ = aquatic morphotypes; FI = forest indicator; GSSC = grass-silica short cell; CH = closed habitat; POOID-D = Pooid, diagnostic; POOID-ND = Pooid, nondiagnostic; PACMAD = Panicoideae, Arund…
							GSSCs						Presence of highly diagnositc GSSC
Sample	Strat	Age	AQ (%)	Palm (%)	Conifer (%)	Other FI (%)	CH (%)	POOID-D	POOID-ND	PACMAD	Other G	Grass-D		Non-diagnostic phytos + other (%)	Unknowns	Total counted
TT-2-7	1129.9	12.86		p		p
TT-2-6	1129.9	12.86		p				p					BI-1
TT-2-4	1063.4	12.95				p
TT-2-1	1020.9	12.98		p	p	p								p
TT-2-2	1002.9	12.99				p
TT-1-2*	995.4	13.04	0.19	36.94	0	11.75	0.37	11.57	2.24	5.97	6.72	0.75	crenates, BI-1, BI-6, PANI, CHLOR	15.11	8.4	536
TT-1-15-2*	994.5	13.05	0	17.21	1.25	10.76	0.57	7.13	1.93	7.93	19.59	0	crenates, BI-1, PANI	20.72	12.91	883
TT-1-1*	993.4	13.06	0	13.78	0.86	14.64	0.11	12.16	6.78	8.61	17.76	0.65	crenates, BI-1, BI-6, PANI, CHLOR	25.3	11.09	929
TT-1-15-10*	990.7	13.07	0	1.27	3.01	34.34	0.63	3.16	0.316	2.37	6.96	0.16	crenates, BI-1, PANI	32.44	15.35	632
TT-1-15-9	981.7	13.21				p								p
RH-15-1*	898	13.69	0.34	1.54	1.54	19.86	2.23	19.35	3.25	17.47	9.76	0.86	crenates, BI-1, PANI, CHLOR	19.18	4.62	584
RH-16-1*	898	13.69	0.15	2.71	1.05	21.35	1.5	18.2	5.26	11.43	12.63	0.75	crenates, BI-1, BI-6, PANI, CHLOR	16.54	8.42	665
RH-16-3*	898	13.69	0.41	2.86	1.22	13.67	0.41	22.65	5.61	14.8	13.47	1.02	crenates, BI-1, BI-6, PANI, CHLOR	15.71	8.16	890
RH-16-5	898	13.69				p
RH-16-7*	898	13.69	0.14	1.67	1.53	42.2	0.56	4.32	0.97	1.81	4.74	8.08	crenates, BI-1, PANI	26.18	7.8	718
RH-16-9	898	13.69		p	p	p								p
OC-2-9	895.5	13.72		p		p
HG-1-4	873	13.82		p		p
OC-1-7	867.5	13.87				p
HG-16-7	860	13.94		p		p
HG-1-3	860	13.94				p
FW-3-10	850.5	14.02				p?
FW-3-7	811.8	14.32				p?
HG-1-1	818	14.35				p?
OC-1-6	825.5	14.55				p
FE-16-10	813	14.71		p
OC-2-8*	799	14.8	0	1.21	6.05	48.18	0	2.42	3.87	0.48	3.39	1.21	crenates, BI-1, CHLOR	15.01	18.16	413
FE-16-1	798	14.81				p
FW-3-2	771.5	15.19				p
OC-2-7	770	15.2				p
FW-3-1	764.8	15.24				p
OC-2-6	731	15.34				vab
OC-2-4	637	15.46				p		p						p
OC-2-3	610.5	15.5				p
CUP-3-2	523.5	15.7		p		p
OC-2-1	524	15.7		p		p
CUP-1-14	482	15.85				p
CUP-1-13	480.2	15.86
CUP-1-12*	469	15.89	0	45.65	0	14.89	0	0.25	0	0	0	0		2.48	36.72	403
CUP-1-11	468	15.91				p
CUP-1-9	459	15.93												p
CUP-1-8	457	15.94												p
Steepside	456	15.99												p
CUP-1-7	425.5	16.05				p?								p
CUP-1-6	399	16.14				p						p
CUP-1-5	373	16.23				p?
CUP-1-4-2	360	16.28		p		p
CUP-1-4-1	340.5	16.34		p		p								p
CUP-1-1	320.5	16.41		p		p
CUP-1-21B	316	16.42		p		p								p
OC-1-5	146	17.06				p
OC-1-4	120.5	17.14				p		p					BI-1	p
LB-1-6	-252	17.16				p
LB-1-5	-262	17.18				p
LB-1-2	-306.5	17.26				p								p
OC-1-3	69	17.29		p		p		p					crenate	p
OC-1-2	54	17.34				p
LB-1-1	-352	17.35	p	p		p		p			p	p		p
LB-1-9	-463.5	17.55		p	p	p						p
LB-1-8	-488	17.6				p						p
